# Supplementary material
Source: PubMed Central journal article supplement (PMC3215025)
Supplement: 1100893108_pnas.201100893SI.pdf [file 1100893108_pnas.201100893SI.pdf]

# Supporting Information

Wang et al. 10.1073/pnas.1100893108

## SI Methods

**Plasmid Vector Construction.** To make PB-TRE, PB-MSCV, and PB-CAG vectors, the TRE was amplified from pTight (Clontech), the MSCV LTR was amplified from pMSCV-Neo (Clontech), and the CAGG promoter was amplified from a pBluescript-CAG vector, and cloned into a PB-bpA vector. cDNAs of the four mouse and human Yamanaka factors were amplified (primers in Table S3) from original retroviral vectors (Addgene) and cloned into the PB-TRE, PB-MSCV, and PB-CAG transposon vectors, respectively. Mouse and human Rarg, Lrh1 and Sf1 were amplified from IMAGE clones (Geneservice) and cloned into transposon vectors.

**Preparation of MEF Cells and HDFn Cells for Reprogramming.** MEFs were prepared from 12.5 d postcoitum Oct4-IRES-Puro-Egfp embryos. To minimize variation among embryos, MEFs from several embryos with the same genotype were mixed together for expansion in M10 media. MEFs were passaged once before they were counted, divided into aliquots, and frozen down. Before electroporation,  $1 \times 10^6$  MEFs were plated onto one gelatinized 15-cm tissue culture plate. When MEFs were 70% to 80% confluent, they were trypsinized and collected for electroporation. M10 was knockout DMEM, 10% FBS (HyClone), 1× glutamine-penicillin-streptomycin (Invitrogen), and 1× NEAA (Invitrogen).

HDFn cells (neonatal, lot nos. 709590 and 2007100654) and HDFa cells (adult, lot nos. 439656 and 617769) were purchased from Invitrogen and maintained in media 106 supplemented with low serum growth supplement (Invitrogen). The primary HDFn or HDFa culture was passaged once before being counted, divided into aliquots, and frozen. Before electroporation,  $5 \times 10^5$  HDFn or HDFa cells were plated onto three T75 tissue culture flasks. When HDFn or HDFa cells were 70% to 80% confluent, they were trypsinized and collected for electroporation.

**Transfection and Cell Culture.** MEF transfection was performed using an Amaxa machine (Lonza) according to the manufacturer's protocol (program A-023). One million MEFs were usually transfected. After electroporation, MEFs were seeded in M15 plus LIF on STO feeders. For Tet-On experiments, M15 containing Dox (1.0  $\mu\text{g}/\text{mL}$ ) was added after transfection and was changed every other day. iPSC colonies were usually picked at day 7 to day 10; 96-well plates and cells were expanded according to standard mouse ES cell culture conditions.

Transfection of HDFn and HDFa cells was achieved using an Amaxa machine according to the manufacturer's protocol (program U-020 for HDFn and program P-022 for HDFa). One million HDFn or HDFa cells were usually used in a transfection. After electroporation, HDFn or HDFa cells were seeded in M15 plus LIF on STO feeders. For Tet-On experiments, PB-TRE-cDNA transposons and PB-CAG-rtTA and PBase plasmids were transfected into HDFs, which were plated onto STO feeders. M15 containing Dox (1.0  $\mu\text{g}/\text{mL}$ ) was added 24 h after transfection and was changed every other day. Dox induction usually lasted for 10 to 20 d. Human iPSC colonies reprogrammed by PB-CAG vectors were usually picked at day 10, and dissociated with trypsin to single-cell suspensions before seeding into 24-well formats. Human iPSC colonies reprogrammed by PB-TRE vectors were usually picked at day 20 to 30, and dissociated with Accutase to single-cell suspensions before seeding in 24-well plates. Stable lines were established from secondary colonies and maintained according to standard mouse ES cell culture conditions.

Mouse and human iPSC colonies were visualized by AP staining using the Leukocyte Alkaline Phosphatase kit (Sigma).

**Cell Proliferation Assay.** Cell proliferation assay was performed using Click-iT EdU Flow Cytometry Assay Kit (Invitrogen) according to the manufacturer's recommendations. Briefly, MEFs transfected with different combinations of reprogramming factors on the PB were stained with 10  $\mu\text{M}$  EdU for 1 h after transfection. EdU-incorporated cells were stained with Alexa Fluor 647 dye and analyzed by flow cytometry.

**Bisulfite Genomic Sequencing.** Bisulfite treatment was performed by using the EpiTect Bisulfite Kit (Qiagen) according to the manufacturer's recommendations. PCR primers are listed in Table S3. Amplified products were cloned into pGEM-T-easy (Promega). Randomly selected clones were sequenced with the M13 forward and M13 reverse primers for each promoters.

**RT-PCR.** RNA was isolated using the RNeasy Mini Kit (Qiagen). The samples were subsequently quantified and treated with gDNA WipeOut. First-strand cDNA was prepared by using the QuantiTect Reverse Transcription Kit (Qiagen). For each RT-PCR, we used 50 to 100 ng of cDNA and primers listed in Table S3. Standard PCR conditions were: 94 °C for 30 s, 60 °C for 30 s, and 68 °C for 30 s for 30 cycles. For real-time PCR, we used TaqMan Gene Expression Assays. TaqMan probes were purchased from Applied Biosciences or custom-designed and synthesized by Applied Biosciences (Table S4). All quantitative PCR was performed in a 9700HT Fast Real-Time PCR System (Applied Biosciences). X-linked human gene expression was determined using SYBR Green RT-PCR kit (Applied Biosciences). Primers are listed in Table S3. Mouse gene expression was determined relative to mouse  $\beta$ -actin using the  $\Delta\text{Ct}$  method. Human gene expression was determined relative to human GADPH gene using the  $\Delta\text{Ct}$  method.

**Luciferase Assay.** Oct4-luc2 plasmid (1.0  $\mu\text{g}$ ) and 100 ng of hRluc/TK (Promega) were transfected into MEFs, together with different combinations of reprogramming factors. Forty-eight hours after transfection, cells were lysed with 1× passive lysis buffer (Promega). Luciferase activities were measured with a Dual-Luciferase reporter assay system (Promega) according to the manufacturer's protocol.

**In Vitro Differentiation of iPSCs.** For monolayer differentiation, mouse iPSCs were harvested by trypsinization and transferred to six wells at adensity of 1 to  $1.5 \times 10^4/\text{cm}^2$  in N2B27. Medium was changed every other day. On day 6, cells were fixed for immunostaining of Tuj1. For EB differentiation, mouse iPSCs were harvested and transferred to a 6-cm Petri dish at density of  $1.5 \times 10^4/\text{cm}^2$  in M15 medium without LIF. After 3 d, the aggregated cells were harvested and plated onto a gelatin-coated six-well plate for another 3 d, then proceed to immunostaining of  $\alpha$ -smooth muscle actin ( $\alpha$ -SMA) and  $\alpha$ -fetoprotein (AFP).

For EB differentiation, human iPSCs were harvested by trypsinization and transferred to a 6-cm Petri dish at density of  $1.5 \times 10^4/\text{cm}^2$  in mouse ES medium without LIF. Medium was changed every other day. After 8 d, the aggregated cells were harvested and plated onto gelatin-coated six wells for another 8 d. Cells were fixed for immunostaining of Tuj1,  $\alpha$ -SMA, and AFP.

**Immunostaining.** For dual staining of SSEA-1 and Nanog, mouse iPSCs were fixed in 4% PFA/PBS solution, blocked in PBS solution with 3% goat serum and 1% BSA, incubated with anti-SSEA-1 antibody (gift from Peter W. Andrews, the Centre for Stem Cell Biology, University of Sheffield, Sheffield, United Kingdom) at 4 °C overnight. Cells were then rinsed with PBS solution, incubated with Alexa 488-conjugated goat anti-mouse IgM (Invitrogen) for 1 h at room temperature. After permeabilization with PBST (PBS solution with 0.3% Triton), cells were incubated with anti-Nanog antibody (Abcam) at 4 °C for overnight. The third day, cells were rinsed with PBST, incubated with Alexa 594-conjugated goat anti-rabbit IgG (Invitrogen) for 1 h at room temperature, and counterstained with DAPI.

For dual staining of H3K27 and Oct4, cells were plated at  $2 \times 10^3$  onto laminin-coated slides in M15 medium with or without LIF (differentiated and undifferentiated mouse iPSCs). After 5 d, cells were fixed and incubated with anti-H3K27 (Cell Signaling) and anti-Oct4 (Santa Cruz) antibodies at 4 °C for overnight. The next day, cells were rinsed with PBS solution and incubated with Alexa 594-conjugated goat anti-rabbit IgG and Alexa 488-conjugated goat anti-mouse IgG (Invitrogen) for 1 h at room temperature and counterstained with DAPI.

For Tuj1,  $\alpha$ -SMA, and AFP immunostaining, differentiated mouse iPSCs were fixed and incubated with anti-Tju1,  $\alpha$ -SMA, or AFP antibody (R&D Systems), respectively, at 4 °C overnight. Cells were rinsed with PBS solution and incubated with Alexa 488-conjugated goat anti-mouse IgG, and counterstained with DAPI.

For human pluripotency markers immunostaining, human iPSCs were fixed in 4% PFA/PBS solution, blocked in PBS solution with 3% goat serum and 1% BSA (for cell surface markers) or PBS solution with 3% goat serum, 1% BSA and 0.1% Triton (for intracellular markers), incubated with cell surface antibodies, SSEA-1, SSEA-3, SSEA-4, Tra-1-60, Tra-1-81 (gifts from Peter W. Andrews, the Centre for Stem Cell Biology, University of Sheffield, Sheffield, United Kingdom) or intracellular antibodies, Oct4, Nanog, Tuj1,  $\alpha$ -SMA, and AFP at 4 °C for overnight. Cells were rinsed and incubated with Alexa 488-conjugated goat anti-mouse, rat IgM, goat anti-mouse IgG or Alexa 594-conjugated goat anti-mouse, rabbit IgG, and counterstained with DAPI.

**Flow Cytometry.** Mouse iPSCs growing in 96-well feeder plates were trypsinized and resuspended in M15. iPSCs were centrifuged at  $200 \times g$  (Eppendorf centrifuge 5702R, A-4-38 rotor) for 3 min, and the medium was removed by putting the plate upside down on tissue. iPSCs were resuspended in PBS solution and analyzed by Cytomics FC-500 (Beckman Coulter).

Human iPSCs growing in six-well plates were trypsinized and resuspended in M15. iPSCs were subsequently washed once with PBS solution, centrifuged, and incubated with SSEA-4-FITC, TRA-1-60-PE, or TRA-1-81-FITC antibodies (BD Bioscience) for 1 h. iPSCs were then washed and resuspended in PBS solution and analyzed by Cytomics FC-500 (Beckman Coulter).

**Teratoma Formation.** Mouse iPSCs were suspended in M10, and  $1 \times 10^6$  cells were injected s.c. into both dorsal flanks of F1 (129S5/C57B6) hybrid mice. Teratomas were dissected, fixed overnight in 10% buffered formalin phosphate, and embedded in paraffin before sectioning. Human iPSCs ( $1 \times 10^6$ ) were injected s.c. into both dorsal flanks of NSG mice (NOD.Cg-Prkdcscid Il2rgtm1Wjl/SzJ; Jackson Laboratory). Teratomas were harvested 8 wk after injection for fixation and sectioning. Sections were stained with H&E. All animal experiments were performed in accordance with the United Kingdom 1986 Animals Scientific Procedure Act and local institute ethics committee regulations.

**Microarray Analysis.** Total RNA from human ES cells, human iPSCs cultured in 2i/LIF medium, and FGF-cultured HiPSCs were hybridized onto human HT-12 v3 and v4 Expression BeadChip (Illumina) according to manufacturer instructions. Arrays were then scanned using the BeadXpress Reader (Illumina). Raw expression files were exported directly from BeadStudio and loaded into R/Bioconductor. Sample data were normalized, and then the mean value was calculated for each transcript from samples in the same group. Pearson correlation analysis of global gene expression (47,232 transcripts) was performed on these arrays.

**Statistical Analyses.** Data are shown as mean and SD. All statistical analyses were done with Excel 2008 (Microsoft) or Prism (GraphPad).





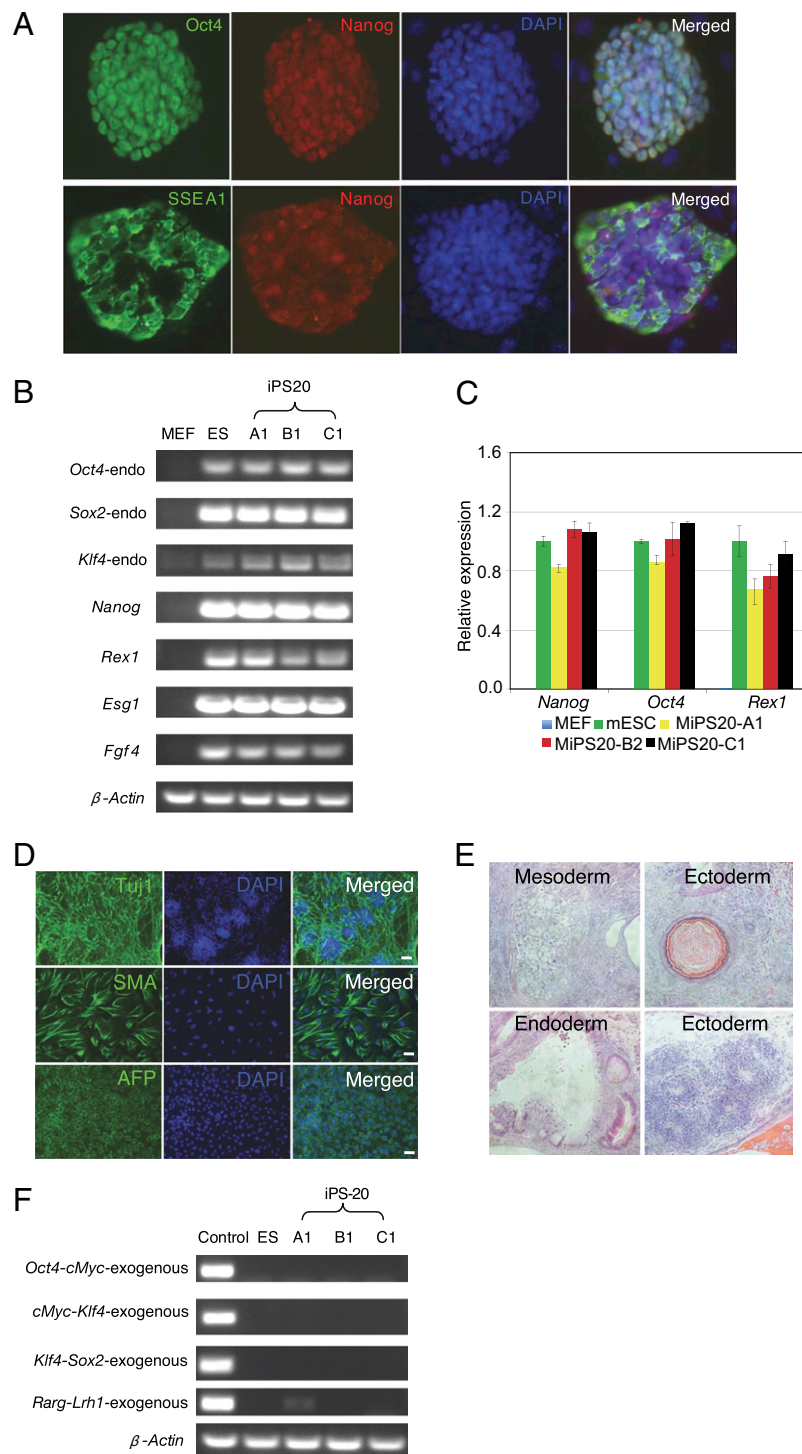

**Fig. S3.** Characterization of mouse iPSCs from expressing 6F. (A) Immunostaining of iPSCs (passage 5) to detect Oct4, Nanog, and SSEA1. (Scale bars: 20.0  $\mu$ m.) (B) Expression of endogenous pluripotency genes in mouse iPSCs by RT-PCR with  $\beta$ -actin as the PCR control. MEF, *Oct4-IRES-Puro-Egfp* knock-in MEFs; ES, *Oct4-IRES-Puro-Egfp* knock-in ES cells. (C) qRT-PCR analysis of expression of *Nanog*, *Oct4*, and *Rex1*. Expression was relative to *Gapdh* and normalized against gene expression in parental *Oct4-GFP* reporter mouse ES cells. MEF, *Oct4-GFP* reporter MEF cells. (D) In vitro differentiation of iPSCs to cell types representing the three germ layers detected by immunostaining. Antibodies: Tuj, neuron-specific class III  $\beta$ -tubulin; SMA, smooth muscle  $\alpha$ -actin; AFP,  $\alpha$ -fetoprotein. (Scale bars: 10.0  $\mu$ m.) (E) Teratomas derived from the iPSCs contained cell types of all three germ layers. Panels show chondrocytes (Upper Left), keratinocytes (Upper Right), gut-like epithelial cells (Lower Left), and neuronal cells (Lower Right). All photographs were taken at the same magnification (200 $\times$ ). (F) RT-PCR analysis of expression of the exogenous reprogramming factors in mouse iPSC lines. Most lines were free of expression of these factors. Control, mouse iPSCs growing in the presence of Dox to induce exogenous factor expression; ES, parental *Oct4-IRES-Puro-Egfp* knock-in ES cells. Three primer pairs—*Oct4-cMyc*-exogenous, *cMyc-Klf4*-exogenous, *Klf4-Sox2*-exogenous—were used to detect junction fragments between cDNAs in PB-TRE-OCKS construct. Expression of RL from PB-TRE-RL construct used a pair of primers (*Rarg-Lrh-1*-exogenous) to detect a junction fragment between R and L. Most iPSC lines did not express the exogenous factors.

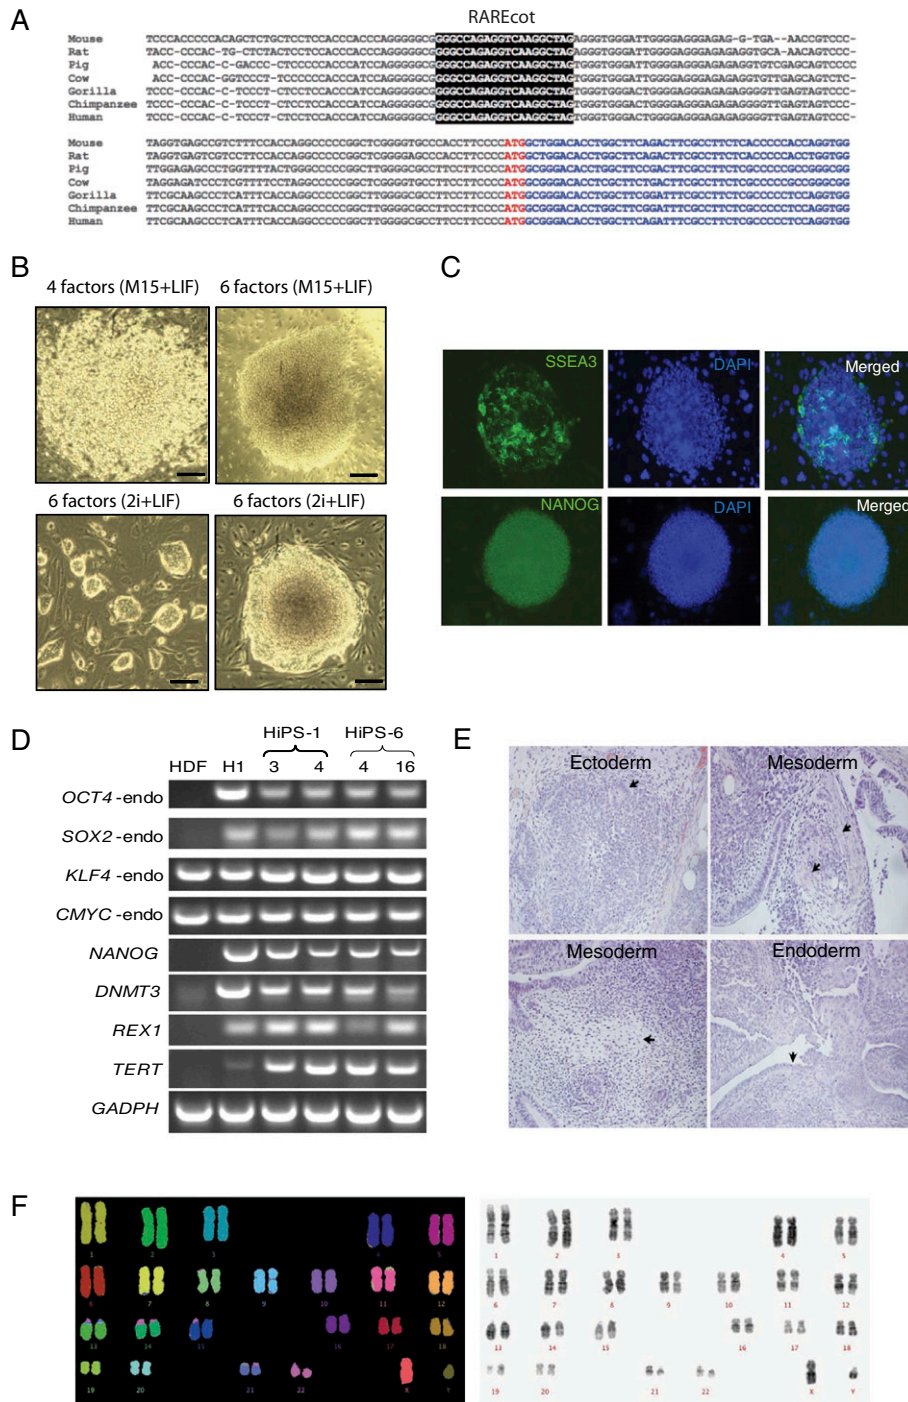

**Fig. 54.** Production of human iPSCs cells using 6F (CAG promoter version). (A) Conservation of RAREoct sequence in several mammalian species. (B) Human iPSCs colonies formed in M15 plus LIF media. *Upper Left:* Typical colony reprogrammed with the four Yamanaka factors. *Upper Right:* Typical iPSC colony reprogrammed using 6F. Images were taken 10 d after transfection. *Bottom Left:* iPSC colonies after the primary colonies were dissociated and replated onto feeder cells; *Lower Right:* Typical iPSC colony after subcloning at the single cell density. (C) Expression of endogenous pluripotency protein in human iPSCs detected by immunostaining. (D) Expression of pluripotency genes in human iPSCs detected by RT-PCR. HiPS1-3 and 4, HiPS6-4 and 16 were four independent iPSC lines. HDF, human dermal fibroblast cells; hESC, H1 human ESCs. (E) Differentiation of human iPSCs to cell types of the three germ layers in teratomas. *Upper Left:* Neural tissue with occasional rosettes (arrow). *Upper Right:* Fibromuscular fibers (arrows). *Lower Left:* Loose mesenchyme (arrow). *Lower Right:* Ciliated glandular epithelia (arrow). All photographs were taken at the same magnification ( $\times 200$ ). (F) Normal karyotype in the human iPSCs after extensive passaging ( $>20$  passages). *Upper:* DAPI. *Lower:* multicolor FISH.

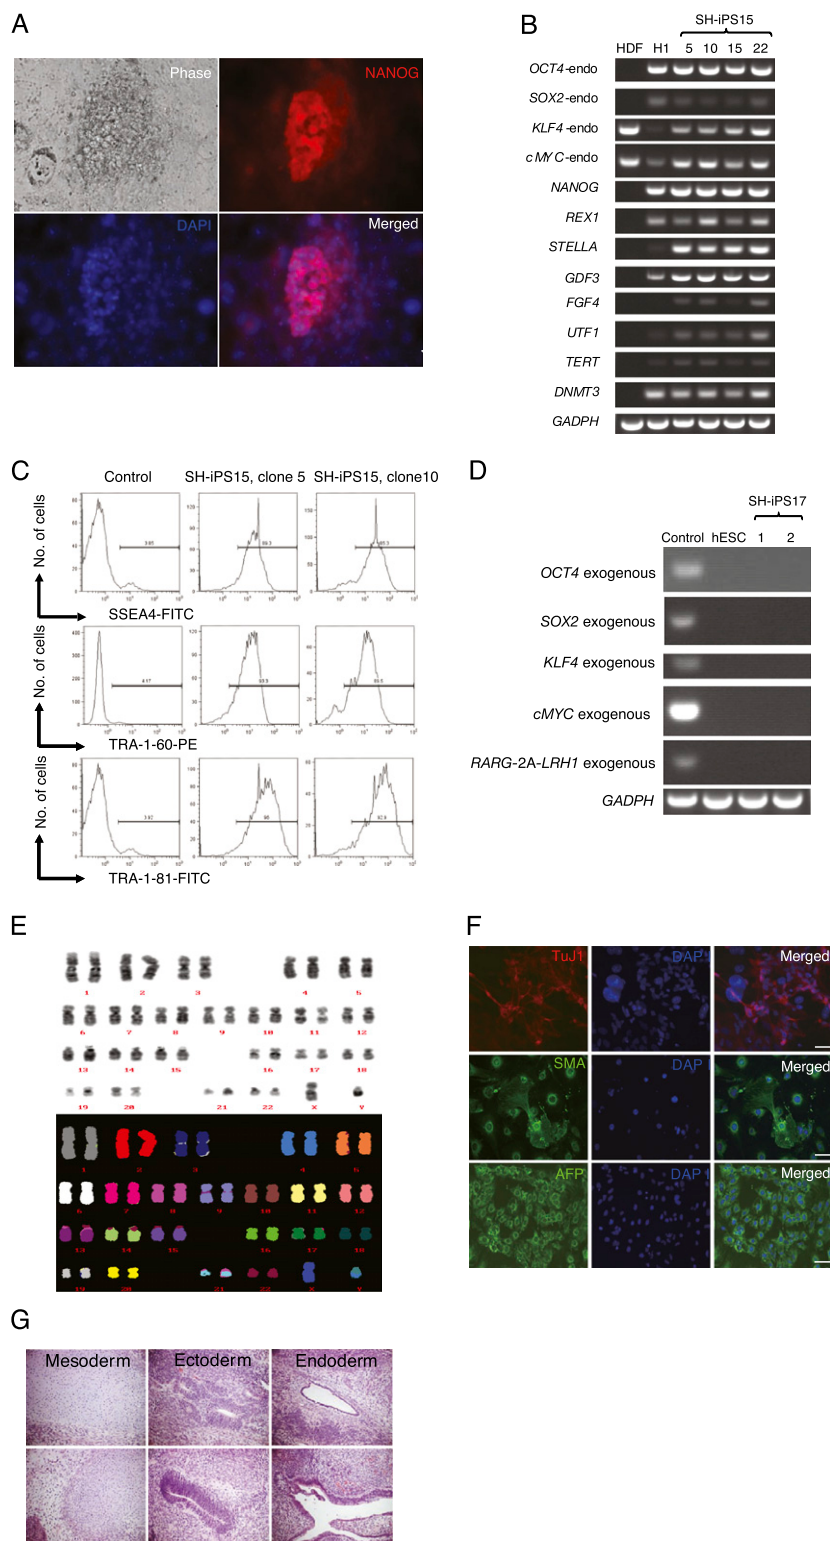

**Fig. S5.** Characterization of the Dox-independent human iPSCs from neonatal fibroblast cells. (A) NANOG expression in primary iPSC colonies (8 d of Dox induction) detected by immunostaining. (Scale bars: 20.0  $\mu\text{m}$ .) (B) RT-PCR analysis of gene expression in human iPSCs with *GADPH* as the control. HDF, human neonatal dermal fibroblast cells; hESC, H1 human ES cells. (C) FACS analysis of human iPSCs for SSEA-4, Tra-1-60, and TRA-1-81 expression. *Left*: HDF control, which did not express SSEA-4, TRA-1-60, or TRA-1-81. (D) No exogenous factor expression was seen in human iPSCs in RT-PCR analysis. Control, expression of the exogenous factors induced by Dox; hESC, H1 human ES cells. (E) Normal karyotype in human iPSCs after extensive passaging (>20 passages). *Upper*: DAPI. *Lower*: MFISH. (F) In vitro differentiation of human iPSCs. Antibodies: Tuj1, neuron-specific class III  $\beta$ -tubulin; SMA, smooth muscle  $\alpha$ -actin; AFP,  $\alpha$ -fetoprotein (scale bars: 10.0  $\mu\text{m}$ ). (G) Teratomas differentiated from human iPSCs. (*Left*) cartilage (mesoderm); (*Center*) neural tissues (ectoderm); ciliated glandular epithelia (endoderm). All photographs were taken at the same magnification ( $\times 200$ ).

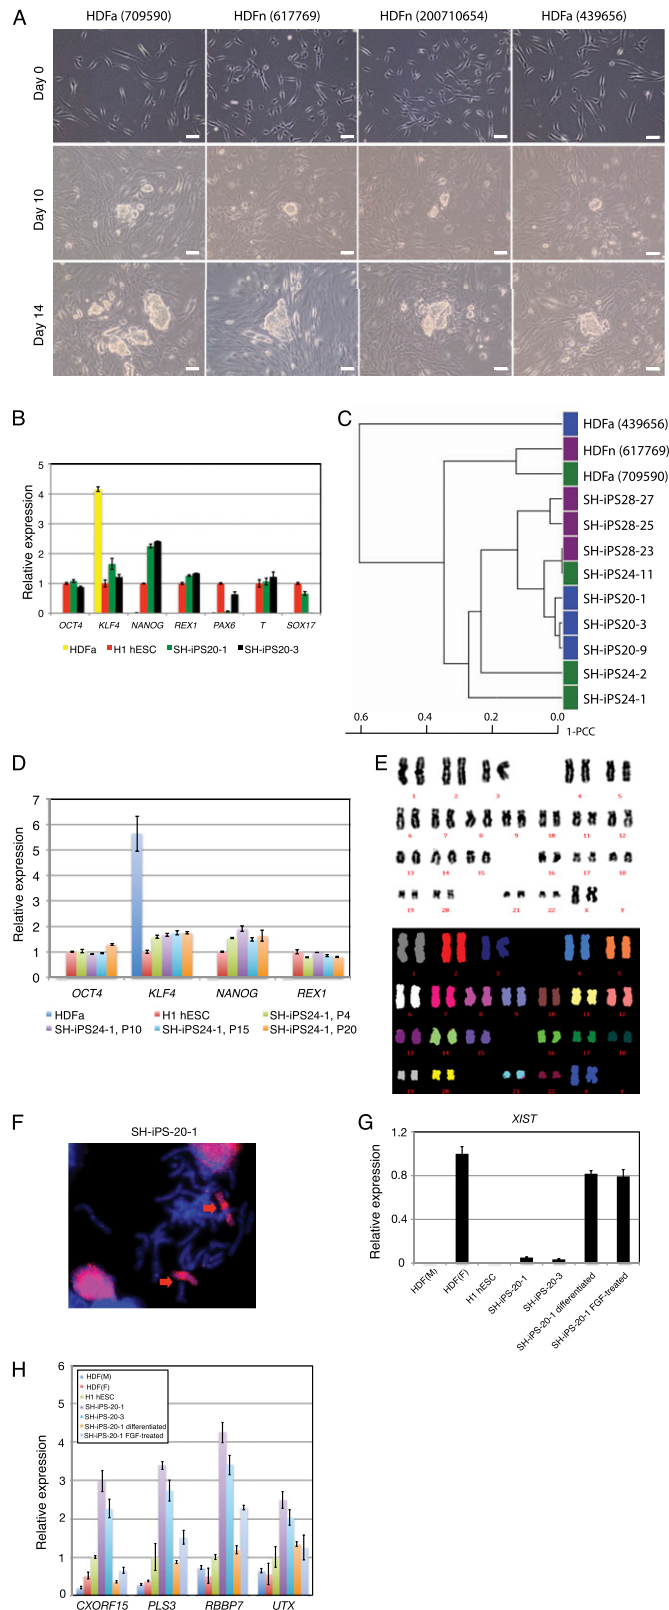

**Fig. S6.** Dox-independent human iPSCs from adult fibroblast cells. (A) Human iPSC colonies formed at two time points (day 10 and day 14 of Dox induction) during reprogramming. HDFa (709590) and HDFa (439656) are two adult primary fibroblast cell lines. HDFn (617769) and HDFn (200710654) are two neonatal primary fibroblast cell lines. *Top*: Parental HDF cell lines used for reprogramming at the day for transfection. These iPSC colonies were growing in M15 plus LIF medium staining. (Scale bars: 10.0  $\mu$ m.) (B) qRT-PCR analysis of key genes in parental HDFa, human iPSCs (passage 10), and H1 hESC cells. SH-iPSC20-1 and -3 are two independent iPSC lines derived from a female adult dermal fibroblast line (439656). Expression was relative to GAPDH and normalized against gene expression in H1 hESCs growing in KSR/FGF medium. Error bars are mean  $\pm$  SD. (C) Global gene expression analysis of nine independent SH-iPSC lines derived

Legend continued on following page





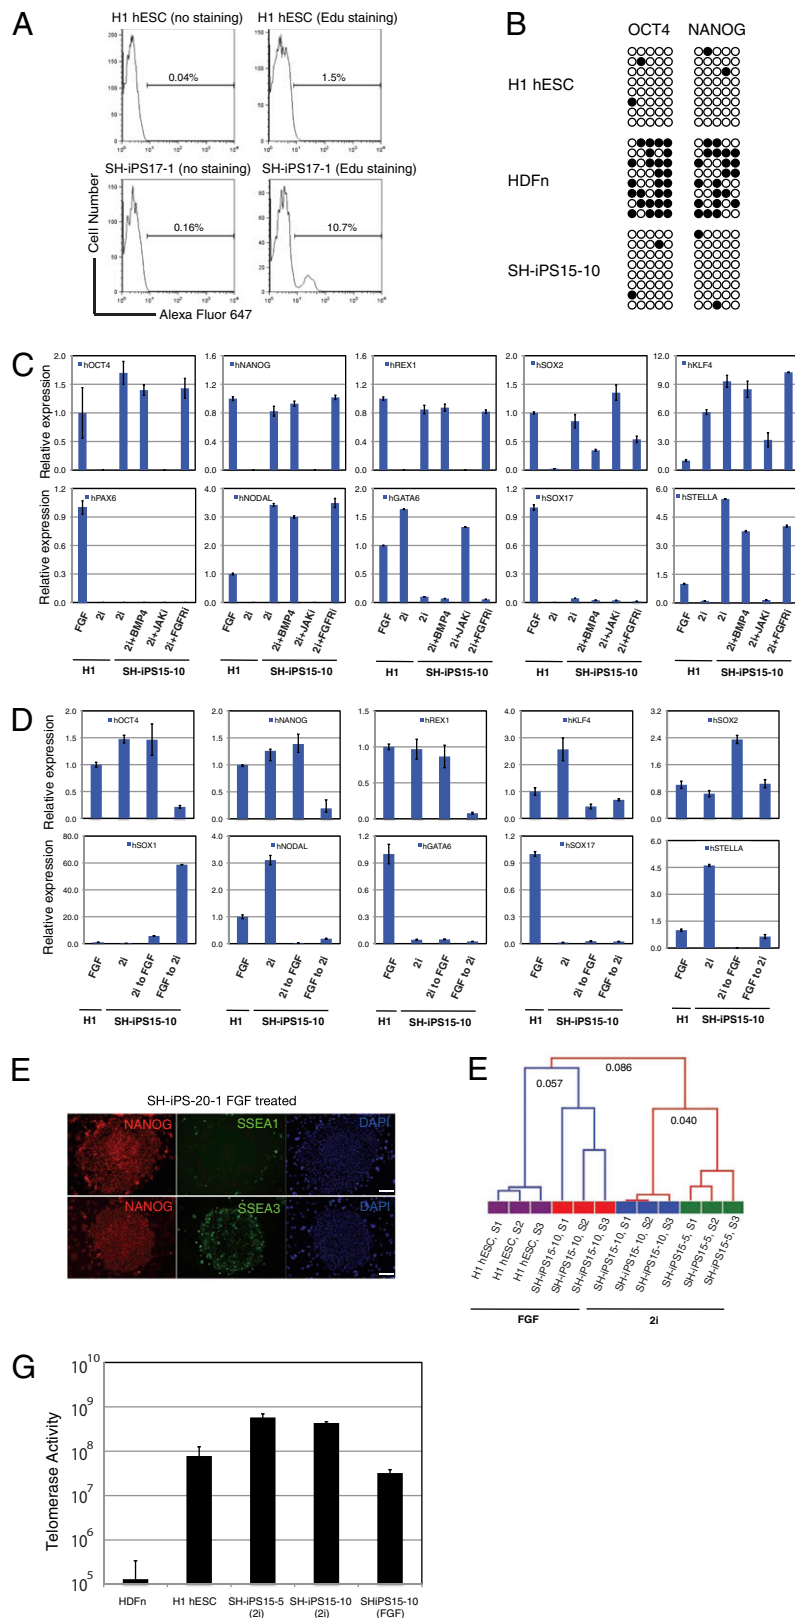

**Fig. S7.** Signaling dependency and gene expression analysis of human iPSCs growing in various conditions. (A) SH-iPSCs (passage 20) maintained in KSR/2i/LIF medium had more dividing cells than H1 hESCs cultured in KSR/FGF (10.7% vs. 1.5%). (B) Nearly complete demethylation in the promoters of *OCT4* and *NANOG* in human iPSCs (passage 20). (C) Robust expression of pluripotency genes (qRT-PCR) in human iPSCs in the presence of FGFRi, but not if a JAKi was added. H1 human ESCs growing in KSR/FGF or in KSR/2i/LIF medium were used as the controls. H1 human ESCs were differentiated in the KSR/2i/LIF medium. (D) Gene expression in the human iPSCs that were cultured in KSR/FGF medium but then switched to KSR/2i/LIF medium. Expression in H1 hESCs growing in KSR/FGF medium was used as the control. Bars are mean  $\pm$  SD. (E) Immunostaining of SH-iPSCs cultured in FGF medium shows that they are SSEA-1-negative (top three

Legend continued on following page

panels) but SSEA-3-positive (bottom three panels). NANOG staining was also performed to detect pluripotent cells. (Scale bars: 20.0  $\mu\text{m}$ .) (F) Global gene expression analysis of SH-iPSCs (passage 40, KSR/2i/LIF), human ESCs, and SH-iPSCs that were cultured first in KSR/2i/LIF medium but then in KSR/FGF. Expression profiles are clustered based on correlation. Three RNA samples (S1–S3) from each growth condition or cell type were used in the array analysis. The numbers represent the correlation value of three levels. (G) Telomerase activity in human ESCs, SH-iPSCs (passage 40) cultured in KSR/2i/LIF medium (2i), and the FGF-cultured human iPSCs (FGF). The arbitrary telomerase units of each sample were calculated based on TSR8 control template amplification.

**Table S1. Y chromosome polymorphisms in HDFn and human iPSCs**

| YSTRs      | HDFn   | HiPS1, 3–1 | HiPS1, 3–5 | HiPS1, 4–3 | HiPS1, 4–5 |
|------------|--------|------------|------------|------------|------------|
| B_DYS456   | 14     | 14         | 14         | 14         | 14         |
| B-DYS389I  | 12     | 12         | 12         | 12         | 12         |
| B_DYS390   | 23     | 23         | 23         | 23         | 23         |
| B_DYS389II | 28     | 28         | 28         | 28         | 28         |
| G_DYS458   | 15     | 15         | 15         | 15         | 15         |
| G_DYS19    | 15     | 15         | 15         | 15         | 15         |
| G_DYS385   | 13, 14 | 13, 14     | 13, 14     | 13, 14     | 13, 14     |
| Y_DYS393   | 12     | 12         | 12         | 12         | 12         |
| Y_DYS391   | 11     | 11         | 11         | 11         | 11         |
| Y_DYS439   | 8      | 8          | 8          | 8          | 8          |
| Y_DYS635   | 23     | 23         | 23         | 23         | 23         |
| Y_DYS392   | 11     | 11         | 11         | 11         | 11         |
| R_Y_GATA   | 11     | 11         | 11         | 11         | 11         |
| R_DYS437   | 16     | 16         | 16         | 16         | 16         |
| R_DYS438   | 11     | 11         | 11         | 11         | 11         |
| R_DYS448   | 20     | 20         | 20         | 20         | 20         |

Sixteen human Y chromosome markers were used for the genotyping (copy numbers in parentheses): B\_DYS456 (14), B\_DYS389I (12), B\_DYS390 (23), B\_DYS389II (28), G\_DYS458 (15), G\_DYS19 (15), G\_DYS385 (13, 14), Y\_DYS393 (12), Y\_DYS391 (11), Y\_DYS439 (8), Y\_DYS635 (23), Y\_DYS392 (11), R\_Y\_GATA (11), R\_DYS437 (16), R\_DYS438 (11), R\_DYS448 (20).

**Table S2. Summary of experimental data on reprogramming human fibroblast cells**

| Electroporation | Parental cells    | Cell no. seeded per 10-cm plate | DOX induction time, d | No. of DOX-free iPS colonies | No. of picked colonies | No. of established colonies |
|-----------------|-------------------|---------------------------------|-----------------------|------------------------------|------------------------|-----------------------------|
| 15–1            | HDFn (2007100654) | 250,000                         | 16                    | 93                           | 12                     | 8                           |
| 19–1            | HDFn (709590)     | 250,000                         | 8                     | 2                            | 0                      | 0                           |
| 19–2            | HDFn (709590)     | 250,000                         | 10                    | 24                           | 0                      | 0                           |
| 19–3            | HDFn (709590)     | 250,000                         | 12                    | 39                           | 0                      | 0                           |
| 19–4            | HDFn (709590)     | 250,000                         | 14                    | 56                           | 0                      | 0                           |
| 19–5            | HDFn (709590)     | 250,000                         | 16                    | 76                           | 0                      | 0                           |
| 19–6            | HDFn (709590)     | 250,000                         | 18                    | 102                          | 0                      | 0                           |
| 20–3            | HDFa (439656)     | 250,000                         | 20                    | 204                          | 15                     | 4                           |
| 21–1            | HDFa (439656)     | 250,000                         | 16                    | 125                          | 9                      | 2                           |
| 24–2            | HDFa (617769)     | 250,000                         | 14                    | 196                          | 24                     | 6                           |
| 24–2            | HDFa (617769)     | 250,000                         | 20                    | 148                          | 0                      | 0                           |
| 28–1            | HDFn (709590)     | 250,000                         | 10                    | 175                          | 18                     | 7                           |
| 28–1            | HDFn (709590)     | 250,000                         | 16                    | 213                          | 24                     | 12                          |

**Table S3. Primers used in cDNA cloning, RT-PCR, and DMR analysis**

| Primer name                             | Primer sequence                         | Purpose                         |
|-----------------------------------------|-----------------------------------------|---------------------------------|
| <b>Mouse/human cDNA cloning primers</b> |                                         |                                 |
| mOct4-F-BglII                           | GAAGATCTCTCCACCTTCCCATGGCTGGACACC       | mOct4 ORF cloning               |
| mOct4-R-EcoRI                           | CGGAATTCTTGATCAACAGCATCACTGAGCTTC       |                                 |
| mSox2-F-BglII                           | GAAGATCTCTGTATAACATGATGGAGACGG          | mSox2 ORF cloning               |
| mSox2-R-EcoRI                           | CGGAATTCTTTCACATGTGCGACAGGGGCAGT        |                                 |
| mKlf4-F-BglII                           | GAAGATCTCACCATGGCTGTCAGCGACGCTCTGCTC    | mKlf4 ORF cloning               |
| mKlf4-R-EcoRI                           | CGGAATTCACATCCACTACGTGGGATTTAAAA        |                                 |
| mcMyc-F-BglII                           | GAAGATCTCACCATGCCCTCAACGTGAACCTCACC     | mcMyc ORF cloning               |
| mcMyc-R-EcoRI                           | CGGAATCTTATGCACCAGAGTTTCGAAGCTGTTCCG    |                                 |
| mRarg-FL/DN-F-EcoRI                     | GGGAATTCCTCCGACGCTACCATGGCCACC          | mRarg-FL/DN cloning             |
| mRarg-DN-R-XbaI                         | GCTCTAGATCATCATCATCCCTTAGTGCTGATGC      | mRarg-DN cloning                |
| mRarg-FL-R-XbaI                         | GCTCTAGAGCCCAACCCACAACGGGG              | mRarg-FL cloning                |
| mRara-FL/DN-F-EcoRI                     | GGGAATTCCTGCTTGGCATGGCCAGCA             | mRara-FL/DN cloning             |
| mRara-DN-R-XbaI                         | GCTCTAGATCATCATCATGGGATCTCCATCTTCAA     | mRara-DN cloning                |
| mRara-FL-R-XbaI                         | GCTCTAGAGTGTGAGGTGGTCATGGGGAT           | mRara-FL cloning                |
| mSf1-F-EcoRI                            | GGGAATTCCTCCGCGGGCATGGACTATTCGTACG      | mSf1 ORF cloning                |
| mSf1-R-XbaI                             | GCTCTAGAGGCCACCCAGGCTCAAGTCTGCTTG       |                                 |
| mLrh1-F-EcoRI                           | GGGAATCTTTTCGTAAGAATGTCTGCTAGTTTGG      | mLrh1 ORF cloning               |
| mLrh1-R-XbaI                            | GCTCTAGAGGGGACTTAGGCTCTTTTGGCATGC       |                                 |
| hOCT4-F-EcoRI                           | GGGAATTCACCATGGCGGGACACCTGGCTTCAG       | hOCT4 ORF cloning               |
| hOCT4-R-XbaI                            | GCTCTAGAACCCTCAGTTTGAATGCATGGGAGAGC     |                                 |
| hSOX2-F-EcoRI                           | GGGAATTCACCATGTACAAACATGATGGAGACGGAGCTG | hSOX2 ORF cloning               |
| hSOX2-R-XbaI                            | GCTCTAGATCACATGTGTGAGAGGGGCGAGTGTGC     |                                 |
| hKLF4-F-EcoRI                           | GGGAATTCACCATGGCTGTCAGTGACGCGCTGCTCCC   | hKLF4 ORF cloning               |
| hKLF4-R-XbaI                            | GCTCTAGATTAATAAATGTCTTTCATGTGTAAGGCGAG  |                                 |
| hCMYC-F-EcoRI                           | GGGAATTCACCATGCCCTCAACGTTAGCTTCACCAA    | hCMYC ORF cloning               |
| hCMYC-R-XbaI                            | GCTCTAGATCACGCACAAGAGTCCGTAGCTGTTCAAG   |                                 |
| hLRH1-F-EcoRI                           | GGGAATTCATGTCTTCTAATTCAGATACTGGGG       | hLRH1 ORF cloning               |
| hLRH1-R-XbaI                            | GCTCTAGATTATGCTCTTTTGGCATGCAAC          |                                 |
| hRARG-F-EcoRI                           | GGGAATTCATGGCCACCAATAAGGAGCG            | hRARG ORF cloning               |
| hRARG-R-XbaI                            | GCTCTAGATCAGGCTGGGGACTTCAGGCC           |                                 |
| <b>Mouse/human RT-PCR primers</b>       |                                         |                                 |
| mOct4-RT-En-F                           | TCTTCCACCAGGCCCCCGGCTC                  | RT-PCR for endogenous mOct3/4   |
| mOct4-RT-En-R                           | TGCGGGCGGACATGGGGAGATCC                 |                                 |
| mSox2-RT-En-F                           | TTGCCTTAAACAAGACCAGAAA                  | RT-PCR for endogenous mSox2     |
| mSox2-RT-En-R                           | TAGAGCTAGACTCCGGGCGATGA                 |                                 |
| mKlf4-RT-En-F                           | GCGAACTCACACAGGCGAGAAACC                | RT-PCR for endogenous mKlf4     |
| mKlf4-RT-En-R                           | TCGCTTCCTCTCCTCCGACACA                  |                                 |
| mNanog-RT-En-F                          | CAGGTGTTTGAGGGTAGCTC                    | RT-PCR for mNanog               |
| mNanog-RT-En-R                          | CGGTTTCATCATGGTACAGTC                   |                                 |
| mRex1-RT-F                              | ACGAGTGGCAGTTTCTTCTTGGGA                | RT-PCR for mRex1                |
| mRex1-RT-R                              | TATGACTCACTTCCAGGGGCGACT                |                                 |
| mEsg1-RT-F                              | GAAGTCTGGTTCCTTGGCAGGATG                | RT-PCR for mEsg1                |
| mEsg1-RT-R                              | ACTCGATACACTGGCCTAGC                    |                                 |
| mFgf4-RT-F                              | CGTGGTGAGCATCTTCGGAGTGG                 | RT-PCR for mFgf4                |
| mFgf4-RT-R                              | CCTTCTTGGTCCGCCGTTCTTA                  |                                 |
| mDax1-RT-F                              | TGCTGCGGTCCAGGCCATCAAGAG                | RT-PCR for mDax1                |
| mDax1-RT-R                              | GGGCACTGTTCAAGTTCAGCGGATC               |                                 |
| mGdf3-RT-F                              | GTTCCAACCTGTGCTCGCTCTT                  | RT-PCR for mGdf3                |
| mGdf3-RT-R                              | AGCGAGGCATGGAGAGAGCGGAGCAG              |                                 |
| mUtf1-RT-F                              | GGATGTCCCGGTGACTACGTCTG                 | RT-PCR for mUtf1                |
| mUtf1-RT-R                              | GGCGGATCTGGTTATCGAAGGGT                 |                                 |
| mOct4-DMR-F                             | TGGGTTGAAATATTGGGTTTATTT                | DMR primers for mOct4 promoter  |
| mOct4-DMR-R                             | CTAAAACCAAATATCCAACCATA                 |                                 |
| mNanog-DMR-F                            | GATTTTGTAGGTGGGATTAATTGTGAATTT          | DMR primers for mNanog promoter |
| mNanog-DMR-R                            | ACCAAAAAAACCACACTCATATCAATATA           |                                 |
| mRex1-DMR-F                             | TATATTAATGTTGGAAAAAGTTTAGGTAAT          | DMR primers for mRex1 promoter  |
| mRex1-DMR-R                             | AACTCCTTAAACCCCTCCCTTTTAAATAA           |                                 |
| hOCT4-RT-En-F                           | GACAGGGGGAGGGGAGGAGCTAGG                | RT-PCR for endogenous hOCT3/4   |
| hOCT4-RT-En-R                           | CTTCCCTCCAACCAAGTTGCCCAAAC              |                                 |

**Table S3. Cont.**

| Primer name   | Primer sequence              | Purpose                      |
|---------------|------------------------------|------------------------------|
| hSOX2-RT-En-F | GGGAAATGGGAGGGGTGCAAAGAGG    | RT-PCR for endogenous hSOX2  |
| hSOX2-RT-En-R | TTGCGTGAGTGTGGATGGGATTGGTG   |                              |
| hKLF4-RT-En-F | ACGATCGTGGCCCCGAAAAGGACC     | RT-PCR for endogenous hKLF4  |
| hKLF4-RT-En-R | GCGTCCTGGGAAGGGAGATCCGGAGC   |                              |
| hCMYC-RT-En-F | GCGTCCTGGGAAGGGAGATCCGGAGC   | RT-PCR for endogenous hCMYC  |
| hCMYC-RT-En-R | TTGAGGGGCATCGTCGCGGGAGGCTG   |                              |
| hNANOG-RT-F   | CAGCCCCGATTCTCCACCAGTCCC     | RT-PCR for hNANOG            |
| hNANOG-RT-R   | CGGAAGATTCCCAGTCGGGTTCAAC    |                              |
| hREX1-RT-F    | CAGATCCTAAACAGCTCGAGAAT      | RT-PCR for hREX1             |
| hREX1-RT-R    | GCGTACGCAAATTAAGTCCAGA       |                              |
| hTERT-RT-F    | CCTGCTCAAGCTGACTCGACACGTG    | RT-PCR for hTERT             |
| hTERT-RT-R    | GGAAAAGCTGGCCCTGGGGTGGAGC    |                              |
| hDNMT3B-RT-F  | TGCTGCTCACAGGGCCCGATACTTC    | RT-PCR for hDNMT3            |
| hDNMT3B-RT-R  | TCCTTTCGAGCTCAGTGCACCACAAAAC |                              |
| hUTX-RT-F     | ATTCATAGCAGCGAACAGCC         | qRT-PCR for hUTX by SYBR     |
| hUTX-RT-R     | CTGGACAGCCGCCTCTT            |                              |
| hCXORF15-RT-F | TAGCCCACAAATCCAGCTT          | qRT-PCR for hCXORF15 by SYBR |
| hCXORF15-RT-R | GCCGAAGAGGCGACTGAG           |                              |
| hRBBP7-RT-F   | CCACCAGATGATTCTGCTCA         | qRT-PCR for hRBBP7 by SYBR   |
| hRBBP7-RT-R   | CTTACCGTTCAGTGGCTTCC         |                              |
| hPLS3-RT-F    | TTGCAAAGGCCTCTTTGAGT         | qRT-PCR for hPLS3 by SYBR    |
| hPLS3-RT-R    | CCCAGGACTCTGCGACTTTA         |                              |

**Table S4. Applied Bioscience predesigned and custom-designed TaqMan probes for real-time RT-PCR of mouse and human genes**

| Assay ID                        | Target               | Applied Bioscience gene name            |
|---------------------------------|----------------------|-----------------------------------------|
| <b>Pre-designed qPCR assays</b> |                      |                                         |
| Mm00658129_gH                   | mOct4                | POU domain, class 5, homeobox 1         |
| Mm00516104_m1                   | mKlf4                | Kruppel-like factor 4                   |
| Mm02384862_g1                   | mNanog               | Nanog homeobox                          |
| Mm03053975_g1                   | mRex1                | Zinc finger protein 42                  |
| 4352341E                        | $\beta$ -actin       | Mouse ACTB Endogenous Control           |
| Hs00999632_g1                   | hOCT4                | POU class 5 homeobox 1                  |
| Hs01053049_s1                   | hSOX2                | SRY (sex determining region Y)-box 2    |
| Hs02387400_g1                   | hNANOG               | Nanog homeobox                          |
| Hs00358836_m1                   | hKLF4                | Kruppel-like factor 4                   |
| Hs01931905_g1                   | hSTELLA              | Developmental pluripotency associated 3 |
| Hs00415443_m1                   | hNODAL               | Nodal homologue                         |
| Hs00232018_m1                   | hGATA6               | GATA binding protein 6                  |
| Hs00751752_s1                   | hSOX17               | SRY (sex determining region Y)-box 17   |
| Hs01057642_s1                   | hSOX1                | SRY (sex determining region Y)-box 1    |
| Hs01088114_m1                   | hPAX6                | Paired box 6                            |
| Hs01079824_m1                   | hXIST                | X (inactive)-specific transcript        |
| 4326317E                        | GAPDH                | Human GAPDH endogenous control          |
| <b>Custom qPCR assays</b>       |                      |                                         |
| Assay ID                        | Primer/probe name    | Primer/probe sequence                   |
| hCMYC-endo                      | hCMYC-taq-endo-F     | CCTGAGCAATCACCTATGAACCTG                |
|                                 | hCMYC-taq-endo-R     | TTATGCCCAAAGTCCAATTTGA                  |
|                                 | hCMYC-taq-endo-probe | CAAATGCAACCTCACACCTTGGCTG               |
| hKLF4-endo                      | hKLF4-taq-endo-F     | TTTCACACTGTCTCCCGATGA                   |
|                                 | hKLF4-taq-endo-R     | TCCTGATTATCCACTCACAAGATGA               |
|                                 | hKLF4-taq-endo-probe | CCAGCCAGAAAGCACTACAATCATGGTCAA          |
| hOCT4-endo                      | hOCT4-taq-endo-F     | CACTGTACTCTCGTCCCTTTC                   |
|                                 | hOCT4-taq-endo-R     | CAACCAGTTGCCCAAACCTC                    |
|                                 | hOCT4-taq-endo-probe | CTTCCCCCTGTCTCCGTCACCACTC               |
| hSOX2-endo                      | hSOX2-taq-endo-F     | ACAGCAAATGACAGCTGCAAA                   |
|                                 | hSOX2-taq-endo-R     | AAGTCCAGGATCTCTCATAAAAGTTT              |
|                                 | hSOX2-taq-endo-probe | ATCCACACTCACGAAAAACCGCG                 |
| hLRH1-endo                      | hLRH1-taq-endo-F     | AAAGCTGAAGTAAACAATTCTCAAG               |
|                                 | hLRH1-taq-endo-R     | GCTCGGGCCTTCAAAGGA                      |
|                                 | hLRH1-taq-endo-probe | TGCATCAGCTGTACCTACAATAGCCCCTCC          |
| hRARG-endo                      | hRARG-taq-endo-F     | GAGCCTGGGTTTGGACTCTAAA                  |
|                                 | hRARG-taq-endo-R     | CCTCTTGCCCTGGGAAGTCT                    |
|                                 | hRARG-taq-endo-probe | CTCAGCACTGCCCATGGGTCC                   |

**Dataset S1. A list of mouse gene promoters that contain the putative RAREoct element**

[Dataset S1 \(XLS\)](#)

**Dataset S2. A list of human gene promoters that contain the putative RAREoct element**

[Dataset S2 \(XLS\)](#)

**Dataset S3. Global gene expression analysis of iPSC lines from human neonatal and adult fibroblast cells**

[Dataset S3 \(TXT\)](#)

**Dataset S4. Microarray analysis of gene expression in human ES cells, FGF-cultured human iPSCs and human iPSCs growing in 2i/LIF medium**

[Dataset S4 \(TXT\)](#)
